# Supplementary material
Source: MDPI journal article supplement (https://www.mdpi.com/2076-3417/12/9/4480)
Supplement: s1 [file s1]

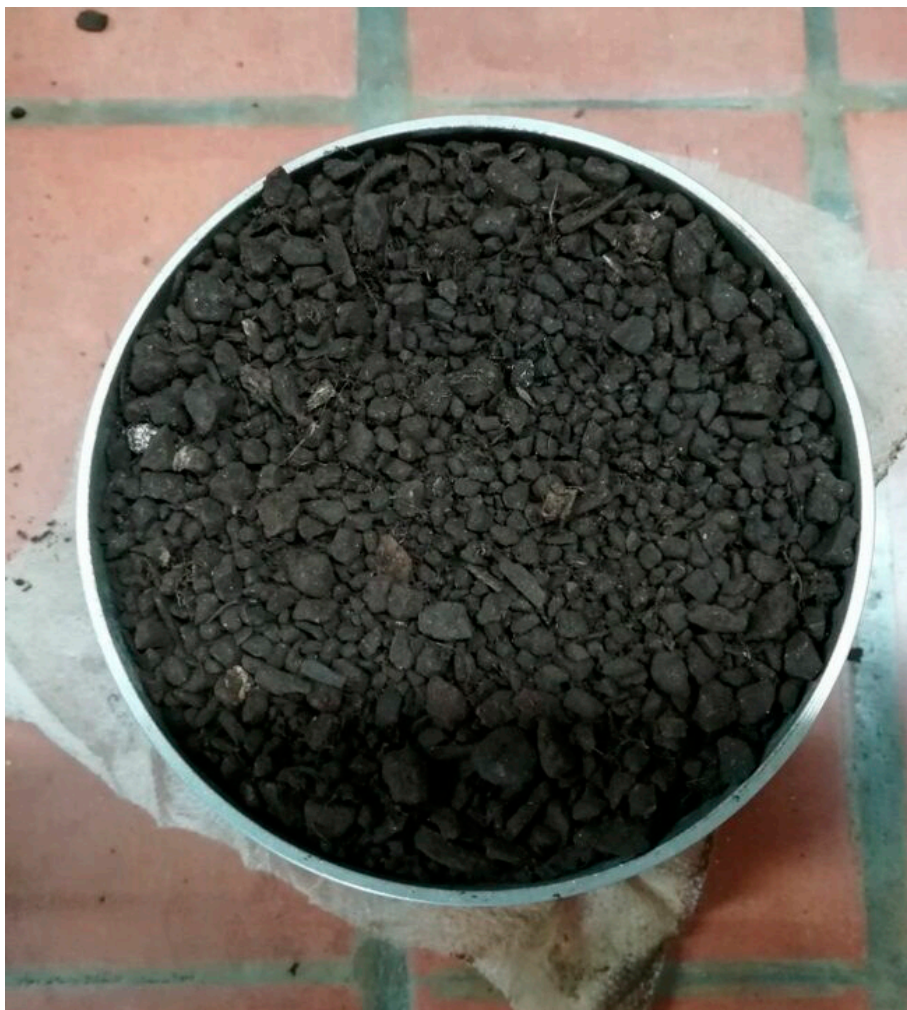

(a)

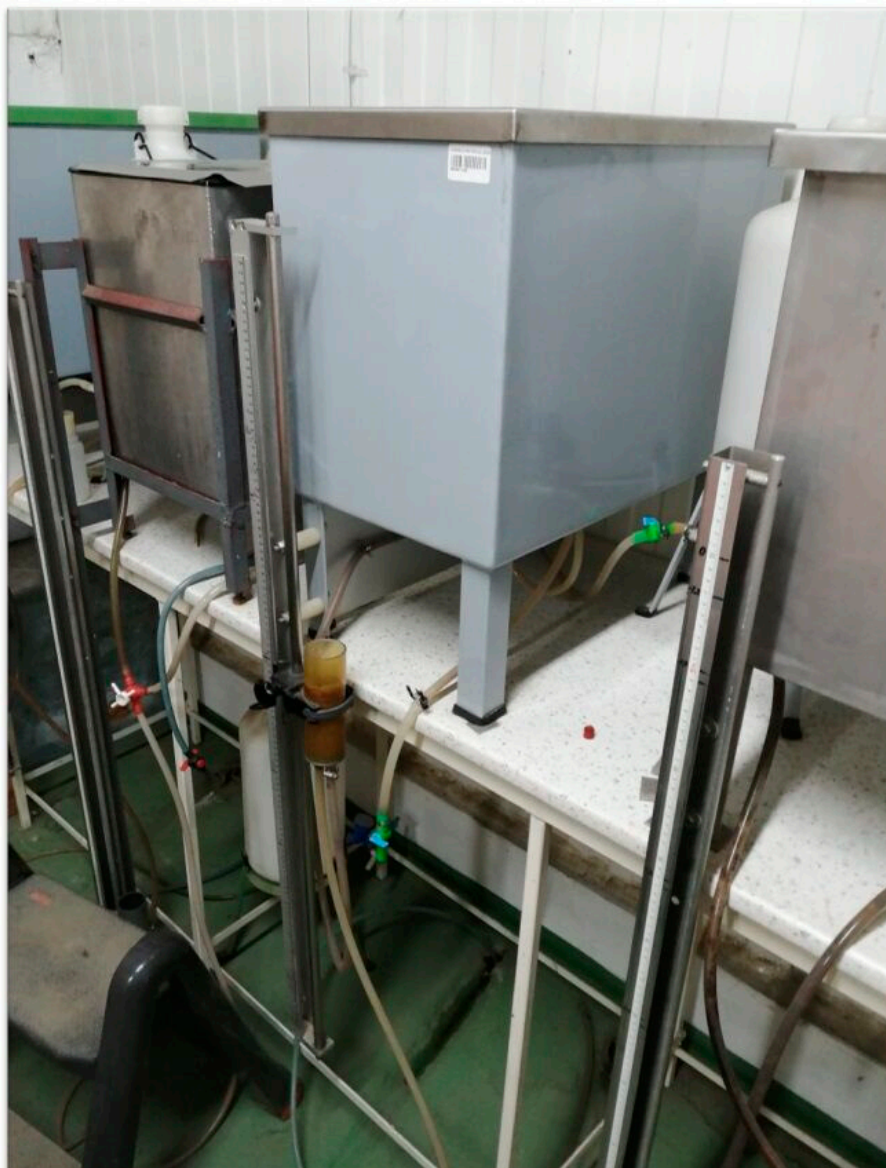

(b)

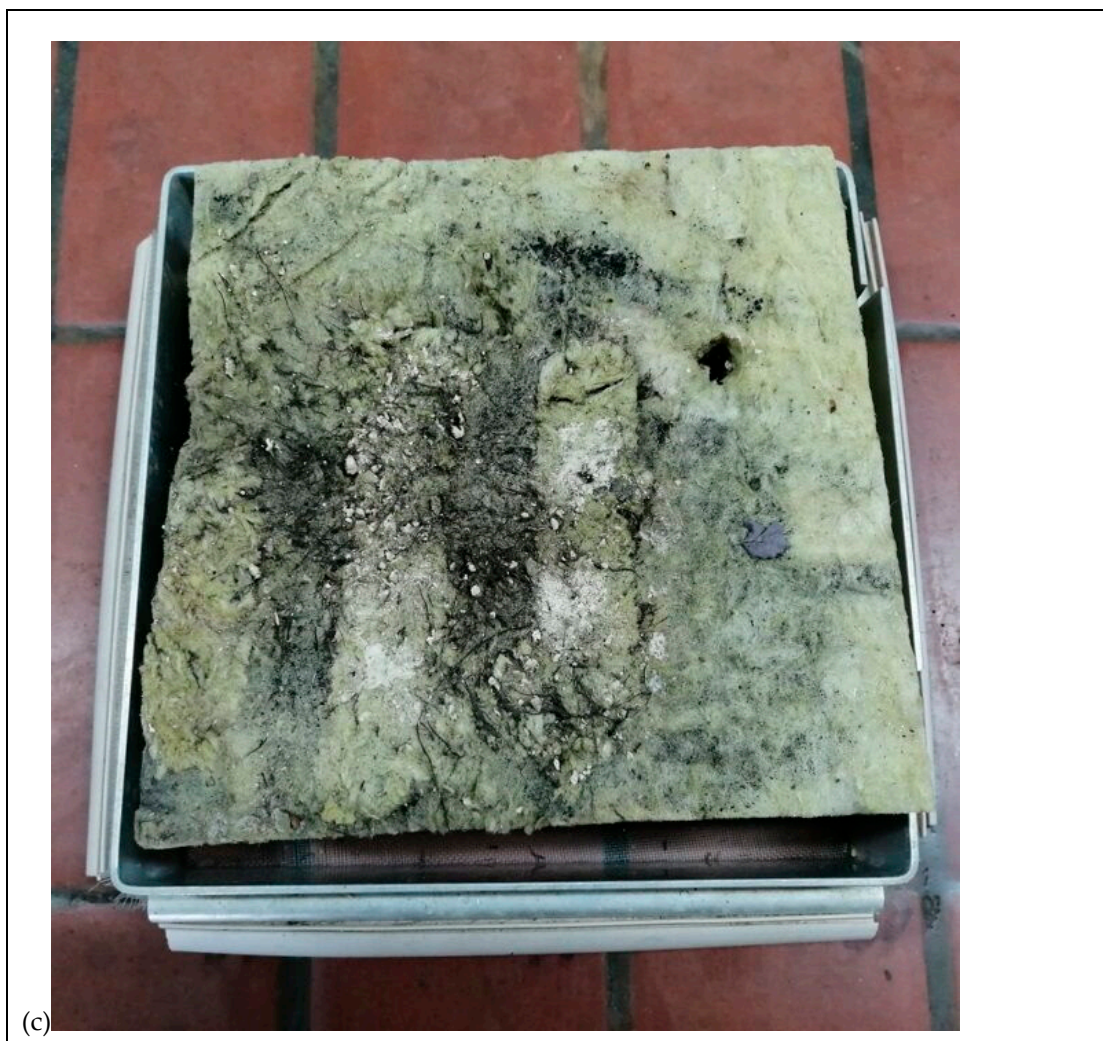

**Figure S1.** Apparatus and substrate samples for physical properties determination: (a) lignite substrate sample (b) Eijkelkamp sand block (c) mineral wool substrate sample.

**Table S1.** Contents of macro- and microelements in cucumber leaves

| Parameter         | Unit                   | MW/control EC      | L/control EC       | MW/high EC         | L/high EC           |
|-------------------|------------------------|--------------------|--------------------|--------------------|---------------------|
| N                 | % DM                   | 4.95 ± 0.2 a       | 4.57 ± 0.20 a      | 5.06 ± 0.3 a       | 4.58 ± 0.2 a        |
| P                 | mg·kg <sup>-1</sup> DM | 4761.7 ± 387.7 ab  | 4611.7 ± 247.6 ab  | 5160.0 ± 233.2 a   | 4053.3 ± 90.7 b     |
| K                 |                        | 35252.0 ± 1347.3 b | 31741.7 ± 992.4 b  | 42275.0 ± 751.4 a  | 34358.3 ± 657.3 b   |
| Ca                |                        | 5878.3 ± 9535.0 b  | 65008.3 ± 9521.9 a | 52841.7 ± 8180.9 b | 62133.3 ± 7904.4 ab |
| Mg                |                        | 8420.0 ± 961.5 c   | 8301.7 ± 657.2 c   | 10137.5 ± 1172.1 a | 9429.2 ± 529.9 b    |
| S-SO <sub>4</sub> |                        | 8733.0 ± 471.5 b   | 12093.0 ± 1030.6 a | 8079.8 ± 281.8 b   | 11574.6 ± 848.4 a   |
| Fe                |                        | 105.2 ± 7.0 c      | 539.2 ± 66.6 b     | 87.0 ± 4.4 c       | 938.6 ± 152.9 a     |
| Mn                |                        | 69.8 ± 3.5 c       | 194.0 ± 4.9 b      | 128.1 ± 7.1 bc     | 324.1 ± 10.7 a      |
| Cu                |                        | 18.6 ± 0.2 a       | 8.4 ± 0.1 b        | 9.9 ± 0.1 b        | 6.7 ± 0.1 b         |
| Zn                |                        | 34.6 ± 2.6 b       | 53.1 ± 1.8 a       | 37.0 ± 4.0 b       | 53.2 ± 3.8 a        |
| B                 |                        | 67.4 ± 6.7 b       | 212.3 ± 31.4 a     | 90.9 ± 4.6 b       | 268.3 ± 28.6 a      |

Average values marked with the same letters within the same row are not significantly different within the analysed parameter at  $p < 0.05$ . Values with the prefix ± represent standard deviation. Abbreviations: ns, not significant.

**Table S2.** Chosen morphological characteristics of cucumber grown hydroponically (two-year average for the substrates and the nutrient EC)

|                                    | Shoot length increase per week | Leaf number per week    | Shoot diameter | Leaf length | Leaf width  | Leaf area       | Petiole lenght |
|------------------------------------|--------------------------------|-------------------------|----------------|-------------|-------------|-----------------|----------------|
| Unit                               | cm                             | pcs plant <sup>-1</sup> | mm             | cm          |             | cm <sup>2</sup> | cm             |
| Average values for cucumber plants | 59.4 ± 2.1                     | 4.0 ± 0.05              | 7.0 ± 0.69     | 22.7 ± 2.5  | 27.4 ± 3.61 | 629.8 ± 148.9   | 15.8 ± 2.1     |

Values with the prefix ± represent standard deviation.

**Table S3.** Chosen yield characteristics of cucumber grown hydroponically, in the period of 8 weeks after planting until the 35th week of the year (two-year average for the substrates and the nutrient EC)

|                                    | Total yield           | Marketable yield | Unmarketable yield | Number of aborted fruit |
|------------------------------------|-----------------------|------------------|--------------------|-------------------------|
| Unit                               | g plant <sup>-1</sup> |                  |                    | pcs plant <sup>-1</sup> |
| Average values for cucumber plants | 5963.3 ± 1008.0       | 5205.7 ± 1568.0  | 730.7 ± 569.7      | 3.4 ± 3.2               |

Values with the prefix ± represent standard deviation.

**Table S4.** Chosen quality characteristics of hydroponically grown cucumber fruit (two-year average for the substrates and the nutrient EC)

|                                    | Firmness   |             | CIE Lab     |              | Dry matter | TSS       | β-carotene                | Lutein     | Nitrates                               |
|------------------------------------|------------|-------------|-------------|--------------|------------|-----------|---------------------------|------------|----------------------------------------|
| Unit                               | HPE        | C*          | H*          | a */ b *     | %          | %         | mg 100 g <sup>-1</sup> FW |            | mg NO <sub>3</sub> kg <sup>-1</sup> FW |
| Average values for cucumber plants | 63.1 ± 0.9 | 13.75 ± 1.0 | 124.3 ± 2.8 | -0.58 ± 0.02 | 4.2 ± 0.4  | 4.1 ± 0.2 | 0.3 ± 0.05                | 0.4 ± 0.09 | 44.7 ± 32.5                            |

Values with the prefix ± represent standard deviation.
